# Supplementary material for: Impaired HLA Class I Antigen Processing and Presentation as a Mechanism of Acquired Resistance to Immune Checkpoint Inhibitors in Lung Cancer
Source: Oxford University Press journal article supplement (doi:10.1158/2159-8290.cd-17-0593), 2017-10-12
Supplement: 21598290cd170593-sup-183932_2_supp_4287646_fwp5xk.xlsx [file 21598290cd170593-sup-183932_2_supp_4287646_fwp5xk.xlsx]

## Sheet: Table 1
Supplementary Table 1. Patient Characteristics
Cohort	ID No.	Histology	Oncogenic Driver	Smoking Status	Pack Years	ICI Treatment	Site of Pre-ICI Treatment Tissue	Site of ICI Resistant Tissue	Interim Systemic Therapy Between Pre-ICI Specimen Collection and Initiation of ICI Therapy
Acquired Resistance	1	NS	None	F	35	Anti-PD-1	N/A	Adrenal, Left	N/A
	8	NS	ERBB2 A775_G776insYVMA	F	<1	Anti-PD-1	LN, Left Cervical	Brain, Left Occipital	N
	10	S	AKT1 E17K	F	50	Anti-PD-1	LN, Right Peritracheal	LN, Supraclavicular	Y
	11	S	None	F	>100	Anti-PD-1	LN, Right Supraclavicular	LN, Right Axillary	Y
	13	S	None	F	68	Anti-PD-1	Lung, Left Upper Lobe	Liver	Y
	17	NS	None	F	20	Anti-PD-L1	LN, Mammary	Mediastinal Mass	Y
	18	NS	None	F	88	Anti-PD-L1	N/A	Adrenal, Left	N/A
	19	NS/S	None	C	40	Anti-PD-L1	LN, Left Supraclavicular	LN, Right Supraclavicular	N
	22	S	None	F	35	Anti-PD-1/Anti-CTLA-4	N/A	LN, Right Axillary	N/A
	23	S	None	F	30	Anti-PD-L1/Anti-CTLA-4	LN, Mediastinal	Celiac Mass	N
	24	NS	EGFR L858R (MET Amp.)	F	<1	Anti-PD-1/Erlotinib	Lung, Parabronchial Mass	LN, Left Supraclavicular	N
Off Therapy Recurrence	14	NS	EGFR G719A	F	15	Anti-PD-1	Lung, Right Lower Lobe	LN, Left Axillary	Y
	16	NS	None	F	60	Anti-PD-L1	Lung, Right Upper Lobe	Lung, Right Upper Lobe	Y
Mixed Response	26	S	None	F	30	Anti-PD-1/Anti-CTLA-4	N/A	Brain, L Cerebellar; Adrenal, Right	N/A
NS, Non-Squamous; S, Squamous; Amp., Amplification; F, Former Smoker; C, Current Smoker; LN, Lymph Node
Additional cases included in PDX analysis only	ID No.	Histology	Oncogenic Driver	Smoking Status	Pack Years	ICI Treatment	Site of ICI Resistant Tissue for PDX
	3	NS	None	F	45	Anti-PD-1	right lung
	7	NS	BRAF D594N	F	50	Anti-PD-1	bone
